# Supplementary material for: Analysis of bidirectional promoter activity and structure of the large intergenic region (LIR) in mulberry crinkle leaf virus
Source: Research Square preprint supplement (doi:10.21203/rs.3.rs-8036347/v1), 2025-12-02
Supplement: Supplementary file 1 [file 636d109201e3c57db7f7a05c.docx]

**Analysis of bidirectional promoter activity and structure of the large intergenic region (LIR) in mulberry crinkle leaf virus**

**Jing-Jing Yang1, +, Ying Huang1, +, Meng-Si Zhan****g1, William Kojo Smith1, Zi-Jun Wang1, Ke-Qing Liu1,** **Yi-Bo He1, 2, Lei-Lei Shi1, 2,and Quan-You Lu1, 2,***

**Supplemental table S1, S2 and S3**

**Supplemental figure S1 and S2**

**Table S1 Primers used in this paper**

| Primer | Primer Sequence **(5'→3')** |
| --- | --- |
| **For amplification of full-length sequences of MCLV LIR** | |
| PF | CCGAAGCTTTTATAGAAGGGAAGGAGTTG |
| PR | ATTGGATCCCGGTTCCTTGCTCCGC |
| rF | CCGAAGCTTCGGTTCCTTGCTCCGCAAG |
| rR | ATTGGATCCTTATAGAAGGGAAGGAGTTG |
| **For amplification of sequences of rP6 and P6** | |
| P4+1F | CAAAAGGAGGCGGCCGACACAAGGAAAAAGCAAAAGCAGATTC |
| P4+1R | GAATCTGCTTTTGCTTTTTCCTTGTGTCGGCCGCCTCCTTTTG |
| rP4+1F | GAATCTGCTTTTGCTTTTTCCTTGTGTCGGCCGCCTCCTTTTG |
| rP4+1R | CAAAAGGAGGCGGCCGACACAAGGAAAAAGCAAAAGCAGATTC |
| **For amplification of rP6- and P6-truncted mutants** | |
| rPF1 | AAGCTTTTATTAGTGGGTCCCACTTTT |
| rPF4 | AAGCTTTTGTGTCGGCCGCCTCCTT |
| rPF2 | AAGCTTAGCAACCTCTTTAATAATTAT |
| rPR2 | GGACTTTTGGTGGCAGCGGCAAATGAA |
| PF2 | AAGCTTTTGGTGGCAGCGGCAAATGAA |
| PR2 | GGACTTAGCAACCTCTTTAATAATTAT |
| **For construction of MCLVmLIR** | |
| MCLV-5'F | cggggatcctctagagtcgacTTATAGAAGGGAAGGAGTTGA |
| R1 | GGGGGTATTTATAGCTCATCGGTTCCTTGCTCCGCAAG |
| F1 | CTTGCGGAGCAAGGAACCGATGAGCTATAAATACCCCC |
| R2 | CCTTTTCAAACTCTTCATCT |
| F2 | AGATGAAGAGTTTGAAAAGG |
| R3 | AACTCCTTCCCTTCTATAAATGGCTTCAAATTCTAACT |
| F3 | AGTTAGAATTTGAAGCCATTTATAGAAGGGAAGGAGTT |
| MCLV-3'R | agggcatgcctgcaggtcgacCGGTTCCTTGCTCCGCAA |
| **For qPCR assay** | |
| qMCLV F1* | GCAAGTGTCATGCGAACCCC |
| qMCLV R1* | TACCCATTACCACCAGTATG |

Note: The sequences with red and black horizontal underline are the *Hind* III/*BamH* I cleavage sites,respectively. The sequences with wavy line are the homologous arm sequence for homologous recombination between target gene fragments. * These primers were designed by Han et al.

**Table S2 The *cis*-acting elements in LIR predicted by PLACE**

| Elements | Signal sequences | Elements | Signal sequences |
| --- | --- | --- | --- |
| BOXIINTPATPB | (+) ATAGAA | CAREOSREP1 | (-) CAACTC |
| DOFCOREZM | (+) AAAG | CURECORECR | (-) GTAC |
| CURECORECR | (+) GTAC | NODCON2GM | (-) CTCTT |
| OSE2ROOTNODULE | (-) CTCTT | CACTFTPPCA1 | (-) YACT |
| BOXIINTPATPB | (-) ATAGAA | ARR1A | (+) NGATT |
| CAATBOX1 | (-) CAAT | CCAATBOX1 | (-) CCAAT |
| SORLIP1AT | (-) GCCAC | E2FCONSENSUS | (-) WTTSSCSS |
| E2FBNTRNR | (+) GCGGCAAA | EBOXBNNAPA | (-) CANNTG |
| MYCCONSENSUSAT | (-) CANNTG | EBOXBNNAPA | (+) CANNTG |
| MYCCONSENSUSAT | (+) CANNTG | SORLIP2AT | (+) GGGCC |
| TATABOX4 | (-) TATATAA | TATABOX4 | (+) TATATAA |
| ROOTMOTIFTAPOX1 | (-) ATATT | ROOTMOTIFTAPOX1 | (+) ATATT |
| SORLIP1AT | (-) GCCAC | ACGTROOT1 | (-) GCCACGTGGC |
| GBOXLERBCS | (-) MCACGTGGC | EMBP1TAEM | (-) CACGTGGC |
| BOXIIPCCHS | (-) ACGTGGC | ACGTABREMOTIFA2OSEM | (-) ACGTGKC |
| ABREATCONSENSUS | (-) YACGTGGC | ACGTROOT1 | (+) GCCACGTGGC |
| SORLIP1AT | (+) GCCAC | ABREZMRAB28 | (-) CCACGTGG |
| IRO2OS | (-) CACGTGG | ABRERATCAL | (-) MACGYGB |
| GBOXLERBCS | (+) MCACGTGGC | ABREZMRAB28 | (+) CCACGTGG |
| CACGTGMOTIF | (-) CACGTG | EBOXBNNAPA | (-) CANNTG |
| MYCCONSENSUSAT | (-) CANNTG | ABRELATERD1 | (-) ACGTG |
| CACGTGMOTIF | (+) CACGTG | EMBP1TAEM | (+) CACGTGGC |
| EBOXBNNAPA | (+) CANNTG | ABREATCONSENSUS | (+) YACGTGGC |
| MYCCONSENSUSAT | (+) CANNTG | IRO2OS | (+) CACGTGG |
| ABRERATCAL | (+) MACGYGB | ACGTATERD1 | (-) ACGT |
| BOXIIPCCHS | (+) ACGTGGC | ACGTABREMOTIFA2OSEM | (+) ACGTGKC |
| ABRELATERD1 | (+) ACGTG | ACGTATERD1 | (+) ACGT |
| UPRMOTIFIIAT | (-) CCNNNNNNNNNNNNCCACG | SORLIP1AT | (-) GCCAC |
| UPRMOTIFIIAT | (-) CCNNNNNNNNNNNNCCACG | SV40COREENHAN | (+) GTGGWWHG |
| ARR1AT | (+) NGATT | CAATBOX1 | (-) CAAT |
| CCAATBOX1 | (-) CCAAT | E2FCONSENSUS | (+) WTTSSCSS |
| SORLIP2AT  SITEIIATCYTC  WUSATAg  GTGANTG10  PYRIMIDINEBOXOSRAMY1A  GCCCORE  CBFHV  DPBFCOREDCDC3  GT1CONSENSUS  DOFCOREZM  GT1CONSENSUS  DOFCOREZM  GT1CONSENSUS  DOFCOREZM  GT1CONSENSUS  DOFCOREZM  GT1CONSENSUS  PYRIMIDINEBOXOSRAMY1A  GT1CONSENSUS  GT1GMSCAM4  DOFCOREZM  E2FCONSENSUS  CBFHV  SEF4MOTIFGM7S  CACTFTPPCA1  CPBCSPOR  POLASIG3  POLASIG3  DOFCOREZM  OSE2ROOTNODULE | (-) GGGCC  (-) TGGGCY  (-) TTAATGG  (+) GTGA  (-) CCTTTT  (-) GCCGCC  CBFHV  (+) ACACNNG  (+) GRWAAW  (+) AAAG  (+) GRWAAW  (+) AAAG  (+) GRWAAW  (+) AAAG  (+) GRWAAW  (+) AAAG  (+) GRWAAW  (-) CCTTTT  (+) GRWAAW  (+) GAAAAA  (+) AAAG  (+) WTTSSCSS  (+) RYCGAC  (+) RTTTTTR  (-) YACT  (-) TATTAG  (+) AATAAT  (-) AATAAT  (+) AAAG  (-) CTCTT | SORLIP2AT  SORLIP2AT  CAATBOX1  LTRECOREATCOR15  DOFCOREZM  DRECRTCOREAT  LTRECOREATCOR15  POLLEN1LELAT52  GT1GMSCAM4  POLLEN1LELAT52  GT1GMSCAM4  POLLEN1LELAT52  GT1GMSCAM4  POLLEN1LELAT52  GT1GMSCAM4  POLLEN1LELAT52  GT1GMSCAM4  DOFCOREZM  GT1CONSENSUS  DOFCOREZM  ARR1AT  DRECRTCOREAT  LTRECOREATCOR15  DOFCOREZM  CACTFTPPCA1  HDZIP2ATATHB2  HDZIP2ATATHB2  TAAAGSTKST1  NODCON2GM | (+) GGGCC  (-) GGGCC  (+) CAAT  (+) CCGAC  (+) AAAG  (+) RCCGAC  (+) CCGAC  (+) AGAAA  (+) GAAAAA  (+) AGAAA  (+) GAAAAA  (+) AGAAA  (+) GAAAAA  (+) AGAAA  (+) GAAAAA  (+) AGAAA  (+) GAAAAA  (+) AAAG  (+) GRWAAW  (+) AAAG  (+) NGATT  (+) RCCGAC  (+) CCGAC  (+) AAAG  (+) YACT  (+) TAATMATTA  (-) TAATMATTA  (+) TAAAG  (-) CTCTT |

**Table S3 The *cis*-acting elements in P232 predicted by PLACE**

| Elements | Signal sequences | Elements | Signal sequences |
| --- | --- | --- | --- |
| SORLIP1AT | (-) GCCAC | E2FCONSENSUS | (-) WTTSSCSS |
| E2FBNTRNR | (+) GCGGCAAA | EBOXBNNAPA | (-) CANNTG |
| MYCCONSENSUSAT | (-) CANNTG | EBOXBNNAPA | (+) CANNTG |
| MYCCONSENSUSAT | (+) CANNTG | SORLIP2AT | (+) GGGCC |
| TATABOX4 | (-) TATATAA | TATABOX4 | (+) TATATAA |
| ROOTMOTIFTAPOX1 | (-) ATATT | ROOTMOTIFTAPOX1 | (+) ATATT |
| SORLIP1AT | (-) GCCAC | ACGTROOT1 | (-) GCCACGTGGC |
| GBOXLERBCS | (-) MCACGTGGC | EMBP1TAEM | (-) CACGTGGC |
| BOXIIPCCHS | (-) ACGTGGC | ACGTABREMOTIFA2OSEM | (-) ACGTGKC |
| ABREATCONSENSUS | (-) YACGTGGC | ACGTROOT1 | (+) GCCACGTGGC |
| SORLIP1AT | (+) GCCAC | ABREZMRAB28 | (-) CCACGTGG |
| IRO2OS | (-) CACGTGG | ABRERATCAL | (-) MACGYGB |
| GBOXLERBCS | (+) MCACGTGGC | ABREZMRAB28 | (+) CCACGTGG |
| CACGTGMOTIF | (-) CACGTG | EBOXBNNAPA | (-) CANNTG |
| MYCCONSENSUSAT | (-) CANNTG | ABRELATERD1 | (-) ACGTG |
| CACGTGMOTIF | (+) CACGTG | EMBP1TAEM | (+) CACGTGGC |
| EBOXBNNAPA | (+) CANNTG | ABREATCONSENSUS | (+) YACGTGGC |
| MYCCONSENSUSAT | (+) CANNTG | IRO2OS | (+) CACGTGG |
| ABRERATCAL | (+) MACGYGB | ACGTATERD1 | (-) ACGT |
| BOXIIPCCHS | (+) ACGTGGC | ACGTABREMOTIFA2OSEM | (+) ACGTGKC |
| ABRELATERD1 | (+) ACGTG | ACGTATERD1 | (+) ACGT |
| UPRMOTIFIIAT | (-) CCNNNNNNNNNNNNCCACG | SORLIP1AT | (-) GCCAC |
| UPRMOTIFIIAT | (-) CCNNNNNNNNNNNNCCACG | SV40COREENHAN | (+) GTGGWWHG |
| ARR1AT | (+) NGATT | CAATBOX1 | (-) CAAT |
| CCAATBOX1 | (-) CCAAT | E2FCONSENSUS | (+) WTTSSCSS |
| SORLIP2AT | (-) GGGCC | SORLIP2AT | (+) GGGCC |
| SITEIIATCYTC | (-) TGGGCY | SORLIP2AT | (-) GGGCC |
| WUSATAg | (-) TTAATGG | CAATBOX1 | (+) CAAT |
| GTGANTG10 | (+) GTGA | LTRECOREATCOR15 | (+) CCGAC |
| PYRIMIDINEBOXOSRAMY1A | (-) CCTTTT | DOFCOREZM | (+) AAAG |
| GCCCORE | (-) GCCGCC | DRECRTCOREAT | (+) RCCGAC |
| CBFHV  DPBFCOREDCDC3  GT1CONSENSUS  DOFCOREZM  ARR1AT | (+) RYCGAC  (+) ACACNNG  (+) GRWAAW  (+) AAAG  (+) NGATT | LTRECOREATCOR15  GT1CONSENSUS  GT1GMSCAM4  DOFCOREZM  E2FCONSENSUS | (+) CCGAC  (+) GRWAAW  (+) GAAAAA  (+) AAAG  (+) WTTSSCSS |
| DRECRTCOREAT  LTRECOREATCOR15  DOFCOREZM  CACTFTPPCA1  HDZIP2ATATHB2  HDZIP2ATATHB2  TAAAGSTKST1  NODCON2GM | (+) RCCGAC  (+) CCGAC  (+) AAAG  (+) YACT  (+) TAATMATTA  (-) TAATMATTA  (+) TAAAG  (-) CTCTT | CBFHV  SEF4MOTIFGM7S  CACTFTPPCA1  CPBCSPOR  POLASIG3  POLASIG3  DOFCOREZM  OSE2ROOTNODULE | (+) RYCGAC  (+) RTTTTTR  (-) YACT  (-) TATTAG  (+) AATAAT  (-) AATAAT  (+) AAAG  (-) CTCTT |

**
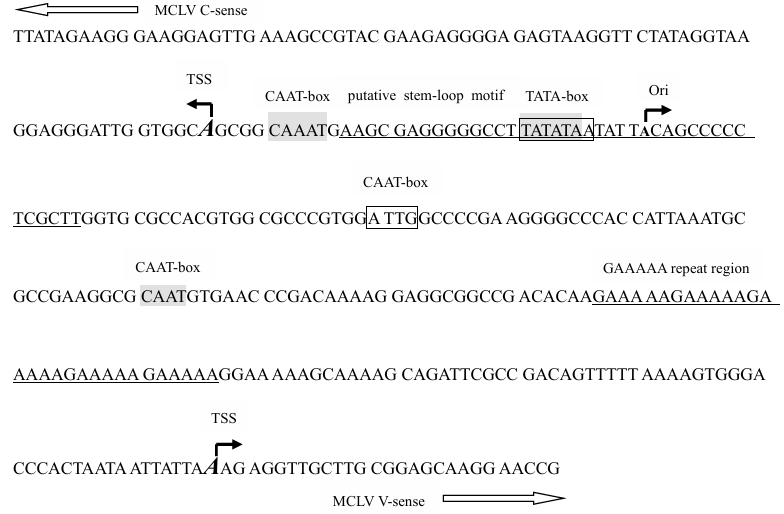
 Figure S1 Predicted map of *cis*-acting elements in MCLV LIR**

Note: Nucleotide sequence, putative core elements TATA-box and CAAT-box, and transcription start sites (TSS) in virion- (V-) and complementary- (C-) sense of the directional promoter P232. The predicted TATA-box and CAAT-box in the V- and C-sense are highlighted with shaded backgrounds boxes, respectively. The underlined sequences are GAAAAA repeat region and putative stem-loop motif. The bigger italic letters and the solid arrows on the top of them indicate the predicted TSS in V-, and C-sense direction. The smaller letter and the solid arrow on the top of its indicate the predicted origin of replication (Ori). The two hollow arrows pointing left and right indicate C-sense V-sense of P232, respectively.


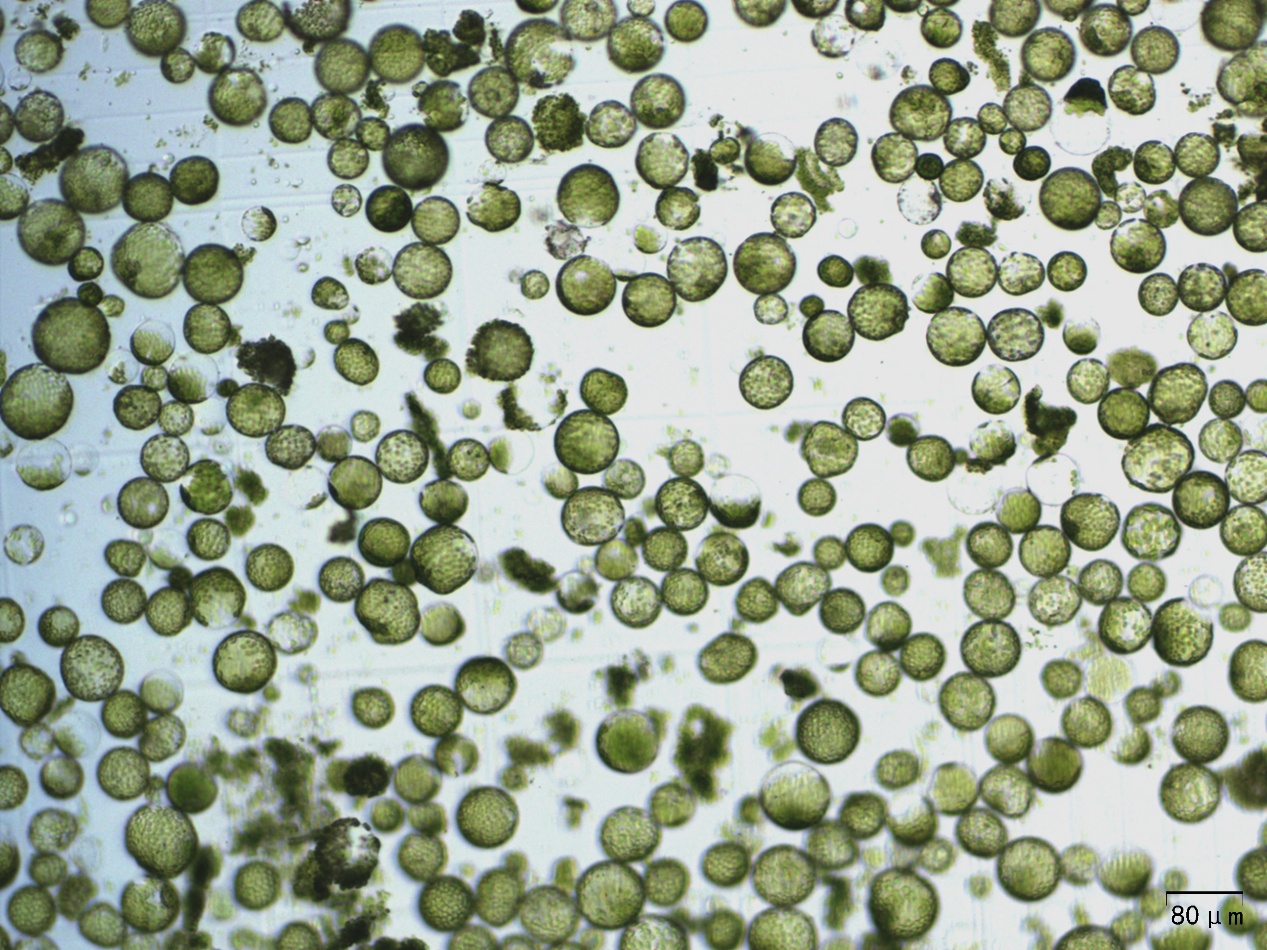


**Figure** **S2 Image of protoplasts isolated from *N. benthamiana***

Scale bar：80 μm
